# Supplementary material
Source: Springer Nature journal article supplement (https://www.springermedizin.de/resource/supplementary/12962_2006_36_MOESM2_ESM.pdf/9572002)

## PANEL A

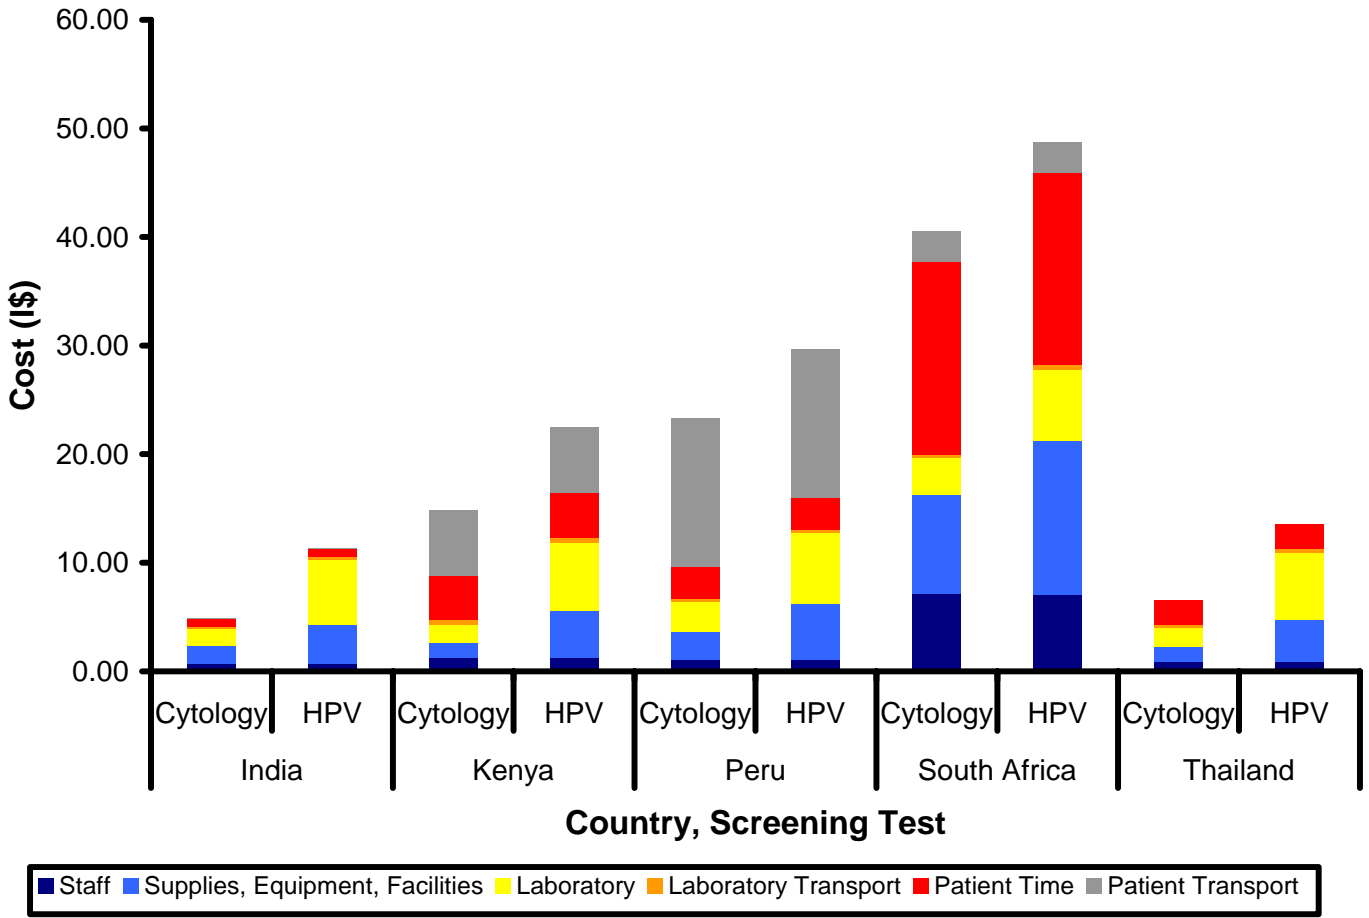

## PANEL B

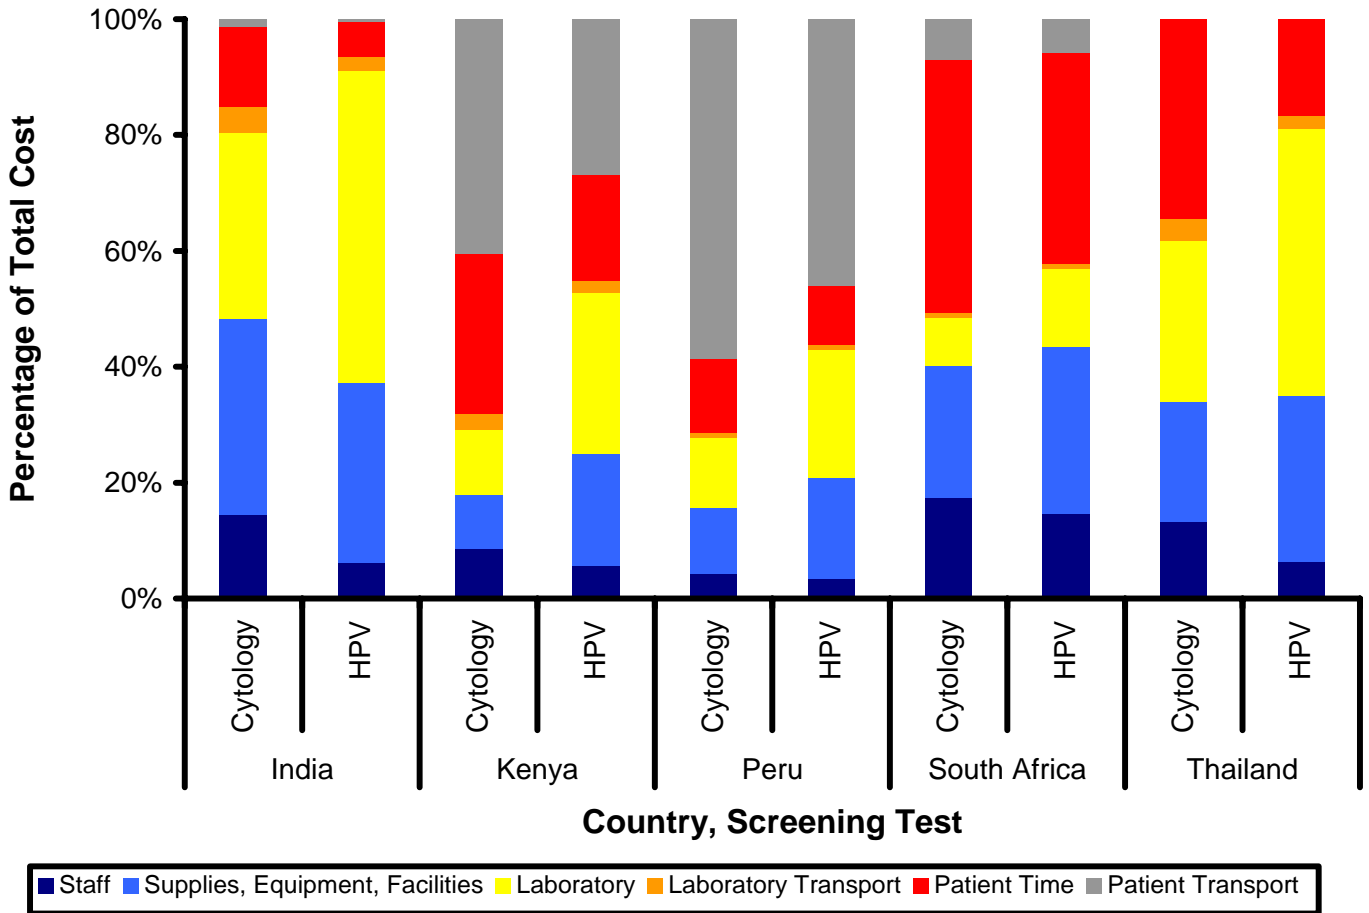

Supplement: MOESM2 [file 9572002]
